# Supplementary material for: Neogene paleogeography provides context for understanding the origin and spatial distribution of cryptic diversity in a widespread Balkan freshwater amphipod
Source: PeerJ journal article supplement (doi:10.7717/peerj.3016), 2017-02-28

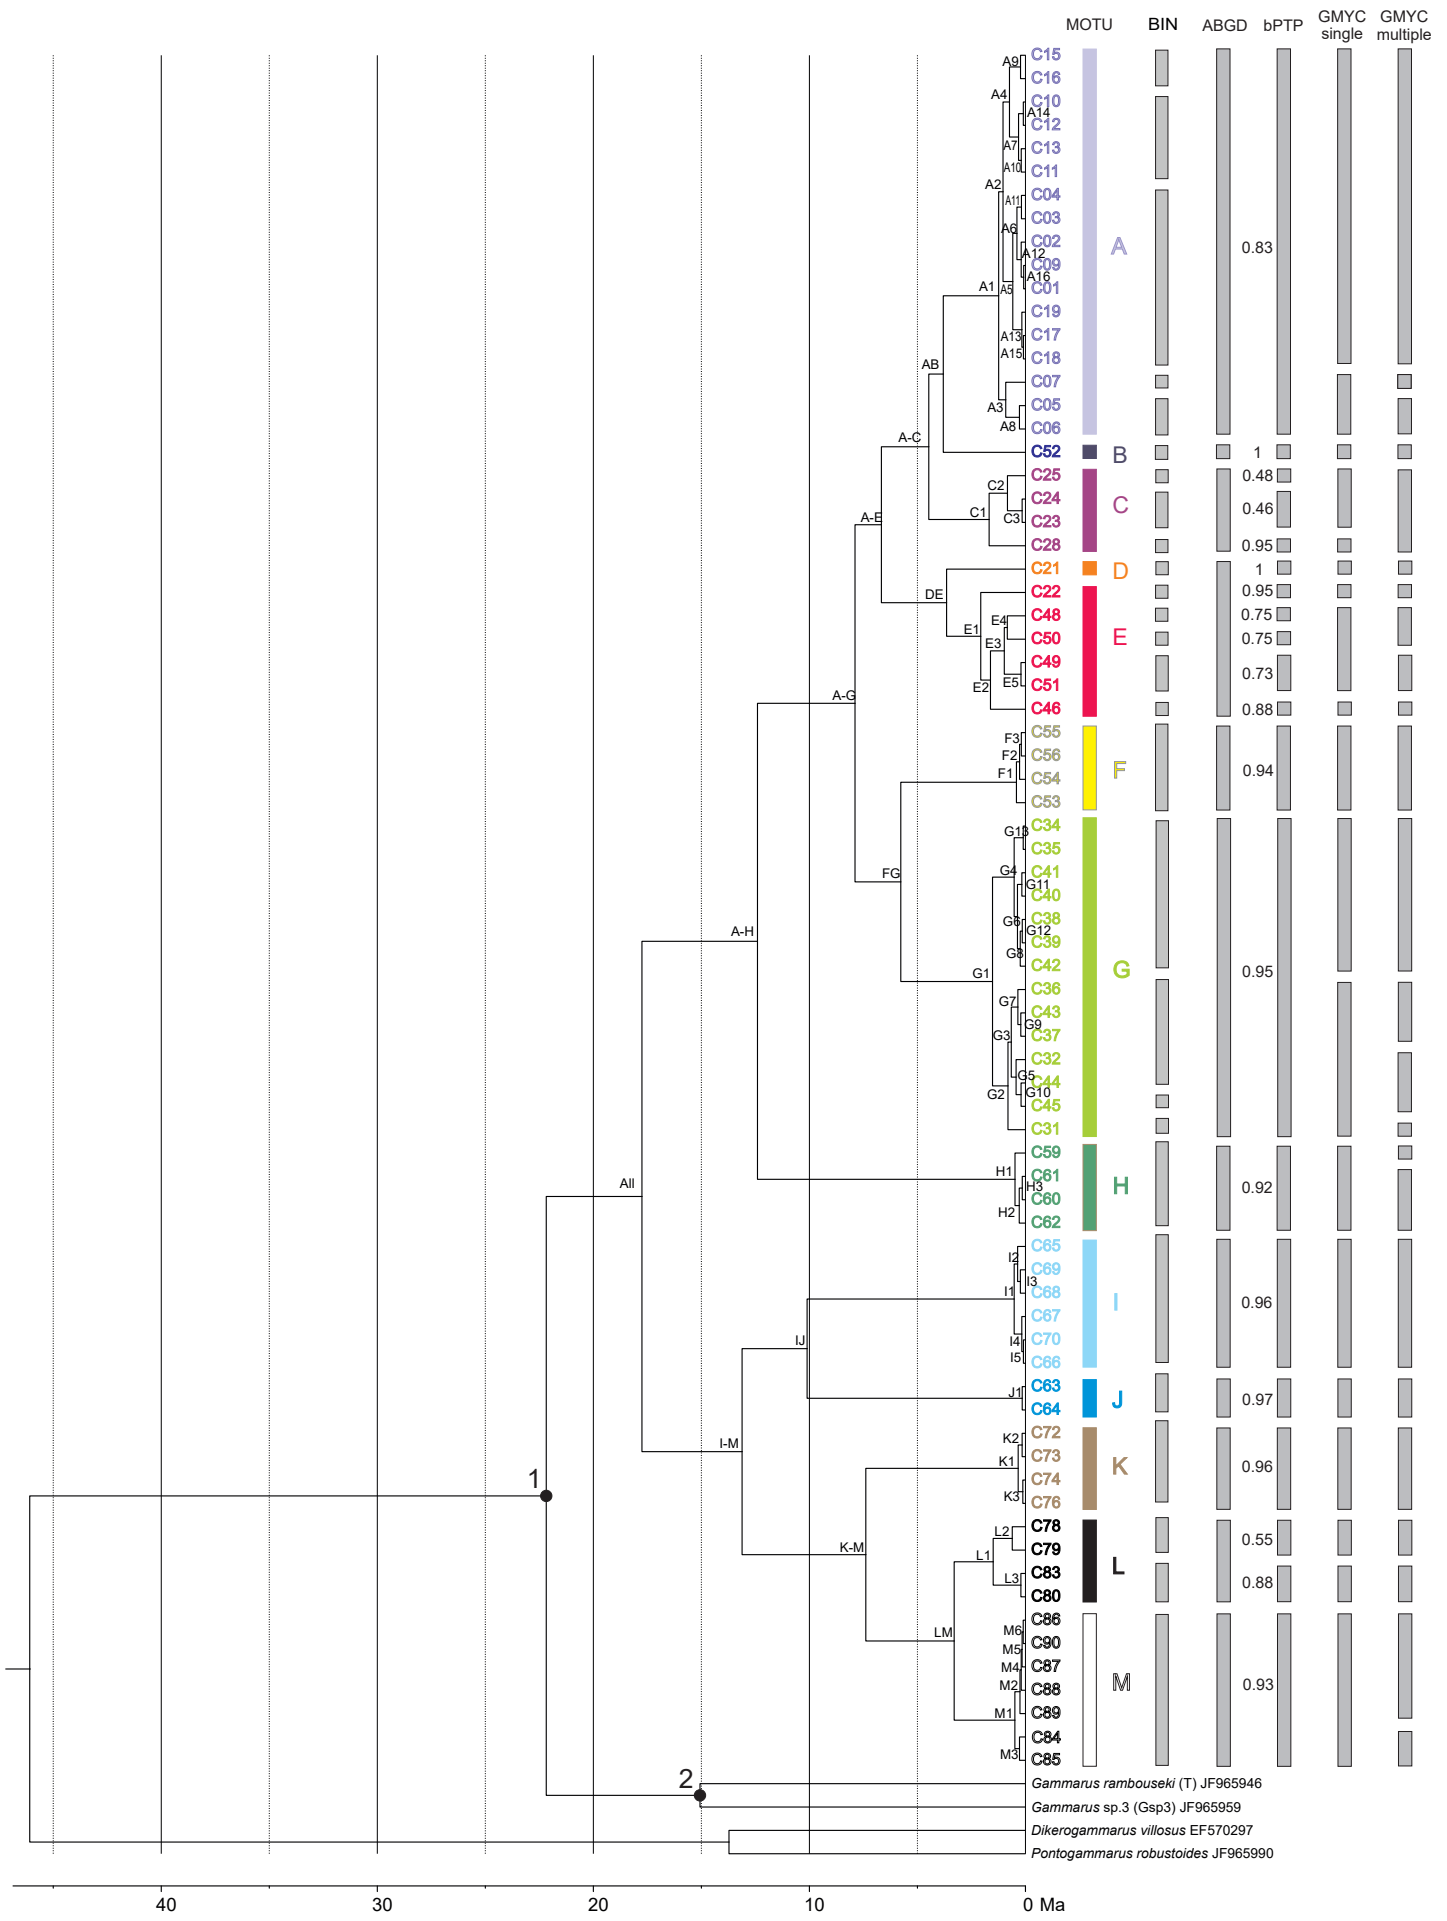

Supplement: Fig_S1_GROE_chronogram_BINS_ok.pdf [file Fig_S1_GROE_chronogram_BINS_ok.pdf]
